# Supplementary material for: A Turn-ON fluorometric biosensor based on ssDNA immobilized with a metal phenolic nanomaterial for the sequential detection of Pb(ii) and epirubicin cancer drug
Source: Royal Society of Chemistry journal article supplement (doi:10.1039/d1ra00939g), 2021-01-01
Supplement: d1ra00939g1.pdf [file d1ra00939g1.pdf]

### Electronic Supplementary Information

#### Turn-ON Fluorometric Biosensor based on ssDNA immobilized with Metal Phenolic Nanomaterial for Subsequent Detection of Pb (II) and Epirubicin Cancer Drug

A. Arunjegan<sup>a</sup>, P. Rajaji<sup>a</sup>, S. Sivanesan<sup>b</sup>, P. Panneerselvam<sup>a\*</sup>

<sup>a\*</sup> Department of Chemistry, SRM Institute of Science and Technology, Kattankulathur, Tamil Nadu, India-603 203.

<sup>b</sup> Department of Applied Science and Technology, A.C Technology, Anna University, Chennai, India 600 025

\* Corresponding author & E-mail address:

[panneerpl@srmist.edu.in](mailto:panneerpl@srmist.edu.in), [panneerchem82@gmail.com](mailto:panneerchem82@gmail.com), Phone: +91 9688538842

List of Figures

**Figure S1. BET analysis for NMc-CuTA**

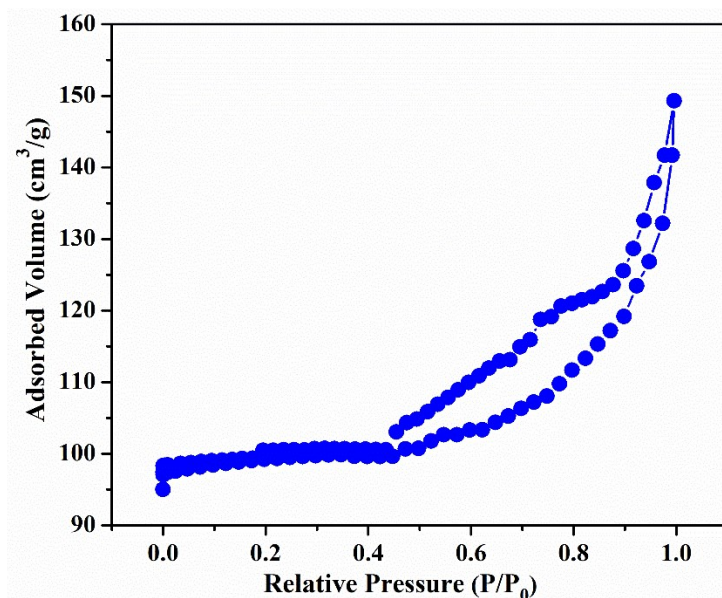

**Figure S1. BET analysis for NMc-CuTA**
